1

2 **Divergent transcriptional and transforming properties of**  
3 **PAX3-FOXO1 and PAX7-FOXO1 paralogs**

4

5 **Short Title: PAX-FOXO1 paralogs generate cellular and molecular heterogeneity**

6

7 Line MANCEAU<sup>1</sup>, Julien RICHARD ALBERT<sup>1</sup>, Pier-Luigi LOLLINI<sup>2</sup>, Maxim V. C.  
8 GREENBERG<sup>1</sup>, Pascale GILARDI-HEBENSTREIT<sup>1#</sup>, Vanessa RIBES<sup>1#</sup>

9

10 <sup>1</sup> Université de Paris, CNRS, Institut Jacques Monod, F-75006 Paris, France

11 <sup>2</sup> Department of Experimental, Diagnostic and Specialty Medicine (DIMES), Alma Mater  
12 Studiorum University of Bologna

13

14 # Corresponding authors: [vanessa.ribes@ijm.fr](mailto:vanessa.ribes@ijm.fr); [pascale.gilardi@ijm.fr](mailto:pascale.gilardi@ijm.fr)

15

16

## 17 **Abstract**

18 The hallmarks of the alveolar subclass of rhabdomyosarcoma are chromosomal translocations  
19 that generate chimeric PAX3-FOXO1 or PAX7-FOXO1 transcription factors. Both PAX-  
20 FOXO1s result in related cell transformation in animal models, but both mutations are associated  
21 with distinct pathological manifestations in patients. To assess the mechanisms underlying these  
22 differences, we generated isogenic fibroblast lines expressing either PAX-FOXO1 paralog.  
23 Mapping of their genomic recruitment using CUT&Tag revealed that the two chimeric proteins  
24 have distinct DNA binding preferences. In addition, PAX7-FOXO1 causes stronger *de novo*  
25 transactivation of its bound regions than PAX3-FOXO1, resulting in greater transcriptomic  
26 dynamics involving genes regulating cell shape and cycle. Consistently, PAX3-FOXO1  
27 accentuates fibroblast cellular traits associated with contractility and surface adhesion and limits  
28 entry into M phase. In contrast, PAX7-FOXO1 drives cells to adopt an amoeboid shape, reduces  
29 entry into S phase, and causes more genomic instabilities. Altogether, our results argue that the  
30 diversity of rhabdomyosarcoma manifestation arises, in part, from the divergence between the  
31 transcriptional activities of PAX3-FOXO1 and PAX7-FOXO1. Furthermore, the identified  
32 pronounced deleterious effects of PAX7-FOXO1 provide an explanation for the low frequency  
33 of the translocation generating this factor in patients with rhabdomyosarcoma.

34

## 35 **Introduction**

36 Fusion-positive rhabdomyosarcomas (FP-RMS) are one of the most metastatic and  
37 deleterious subgroups of paediatric soft tissue cancers [1]. Their emergence and development  
38 are closely associated with the activity of two paralogous fusion transcription factors (TFs),  
39 PAX3-FOXO1 and PAX7-FOXO1 [1]. They are generated by the chromosomal translocations  
40 t(2;13)(q35;q14) and t(1;13)(p36;q14), which fuse the paired DNA-binding (PrD) and  
41 homeodomain (HD) domains of PAX3 or PAX7 to the transactivation domain of FOXO1.  
42 Patients with t(2;13) or t(1;13) translocations have broadly similar symptomatic features, with  
43 clusters of round cells with sparse cytoplasm separated by fibrous septa [2]. In contrast, patients  
44 with the PAX3-FOXO1 translocation are more frequent, generally older, tend to harbour more  
45 metastases, and have poorer survival rates than patients expressing PAX7-FOXO1 [3].

46 These clinical differences could arise from distinct and nonexclusive mechanisms. First,  
47 the specific anatomic positions of PAX3-FOXO1 and PAX7-FOXO1 tumours would argue for  
48 divergences in the cell of origin (e.g.[4]). Second, genetic aberrations that accumulate following  
49 t(2;13) or t(1;13) translocations segregate PAX3-FOXO1 and PAX7-FOXO tumours and may  
50 orient tumours towards distinctive states [5,6]. Both tumour types often undergo genome-wide  
51 duplication and carry focal chromosomal amplifications. While these amplifications extend the  
52 chromosomal segment carrying the PAX7-FOXO1 fusion, they increase the copy number of pro-  
53 proliferative genes in PAX3-FOXO1 tumours. Finally, each of the PAX-FOXO1s could have its  
54 own transcriptional activity. Supporting this idea, PAX3-FOXO1 and PAX7-FOXO1 RMS  
55 differ in their DNA methylation profiles and transcriptome [7–9].

56 PAX3-FOXO1 and PAX7-FOXO1 have been shown, using reporter transgenes, to  
57 possess much greater transactivation potential than the normal TFs PAX3 and PAX7 [10] and to  
58 generate, when combined with pro-proliferative mutations, RMS-like growth masses in several  
59 animal models [11–14]. The molecular mechanisms underlying their tumorigenic transfection

60 activity were mainly studied using PAX3-FOXO1 as a model [15–18]. PAX3-FOXO1 binding  
61 to non-coding *cis*-regulatory modules (CRMs) is mediated by its PrD alone or in combination  
62 with its HD, but rarely by its HD alone [15,16]. Furthermore, PAX3-FOXO1-bound CRMs are  
63 enriched in E-box motifs recognized by bHLH TFs [15,16]. This is consistent with PAX3-  
64 FOXO1 acting with other TFs, including myogenic bHLH TFs in establishing central active  
65 CRMs in RMS cells [15,19]. In addition, the bHLH TF MYOD1 has been shown to increase the  
66 transactivation potential of PAX7-FOXO1 as measured using transcriptional reporters [20],  
67 while both PAX-FOXO1 inhibit MYOD1-mediated myogenic differentiation [21]. Finally,  
68 characterization of the chromatin landscapes of PAX3-FOXO1-bound CRMs in FP-RMS cell  
69 lines and fibroblasts revealed that PAX3-FOXO1 can bind and open previously closed chromatin  
70 loci, which acquire the characteristics of potent transactivating enhancers (super enhancers) [15].  
71 Importantly, the mechanisms by which the two fusion TFs regulate transcription have not yet  
72 been systematically compared [7,10]. Therefore, it is not known whether the recruitment and  
73 genomic trans-activity of PAX7-FOXO1 is reminiscent of PAX3-FOXO1.

74 To gain insights into the role of the PAX-FOXO1 fusion TFs in tumorigenesis and  
75 heterogeneity, we directly compared their activities. By combining transcriptomic and chromatin  
76 profiling experiments with cell morphology and cell cycle assays, our results revealed a  
77 divergent transforming potential between the two PAX-FOXO1s, based on both differential use  
78 of their DNA binding domains and distinct trans-activation potential.

## 79 **Results & discussion**

### 80 **Divergent genomic occupancy and transactivation potential of PAX3-FOXO1 and PAX7-** 81 **FOXO1**

82 To compare the activities of the PAX3-FOXO1 and PAX7-FOXO1 fusion proteins, we sought  
83 to design a system in which their expression can be controlled and expressed at similar levels in  
84 an identical cellular context. Human foreskin fibroblasts (HFF) were engineered to express a  
85 copy of a FLAG-tagged version of these TFs in a doxycycline (DOX)-inducible manner from  
86 the *AAVS1* safeguard locus (Figure S1b). Three independent cell lines expressing PAX3-FOXO1  
87 or PAX7-FOXO1 were used. Their phenotype and that of control HFF cells was analysed 48  
88 hours after DOX exposure. Under this condition, all three PAX3-FOXO1 and PAX7-FOXO1  
89 lines expressed similar fusion protein levels in bulk and at the single cell level (Figure S1c-e).

90 Using these cell lines, we first mapped the genomic targets of PAX3-FOXO1 and PAX7-  
91 FOXO1 using Cleavage Under Targets and Tagmentation (CUT&Tag) experiments [22] (Figure  
92 1; S2). We used two separate antibodies to detect the fusion TFs directed against either the N-  
93 terminal FLAG tag or the C-terminal FOXO1 domain. The latter could be used, as wild-type  
94 FOXO1 levels were low in HFFs (Figure S1c-d). Data obtained with these two antibodies and in  
95 separate cell lines gave similar results, validating the approach (Figure S2a). In total, we  
96 identified 6000 CRMs with PAX3-FOXO1 and/or PAX7-FOXO1 binding signals (Figure 1a,b;  
97 S2a; Table S1). The majority of PAX-FOXO1s bound CRMs occupied distal intronic or  
98 intergenic regions (Figure S2b) and contained DNA motifs known to be recognized by PAX3  
99 and PAX7 DNA-binding domains (Figure 1c-i-iv, S2c; Table S2).

100 For approximately half of these CRMs, the binding signals of PAX3-FOXO1 and PAX7-  
101 FOXO1 were comparable (Figure 1a-i, cluster 1 in 1b). In contrast, 1429 CRMs showed  
102 increased occupancy for PAX3-FOXO1 relative to PAX7-FOXO1 (Figure 1a-ii, cluster 2 in 1b)

103 and 1475 CRMs the opposite (Figure 1a-iii, cluster 3 in 1b). Whereas PAX7-FOXO1 binding  
104 was barely detected in CRMs preferentially bound by PAX3-FOXO1, PAX3-FOXO1  
105 recruitment was detected on most CRMs preferentially bound by PAX7-FOXO1 (Figure 1b).  
106 Hence, the two paralog proteins have divergent recruitment patterns in the genome, with PAX3-  
107 FOXO1 being more widespread than PAX7-FOXO1.

108 To test whether this may stem from a different use of their DNA-binding domains  
109 [23,24], we probed the different sets of CRMs for several PAX3/7- and PAX3-FOXO1-specific  
110 PrD, PrD+HD, and HD DNA motifs (see Materials and Methods; Figure S2c; Table S2). All  
111 PAX-FOXO1-bound CRMs were enriched in motifs recognized by PrD and, to a lesser extent,  
112 by PrD+HD (Figure 1c-i-iii). Motifs recognized by the HD alone were detected in CRMs bound  
113 by both PAX-FOXO1s (Figure 1c-i). However, this motif was sparsely present in PAX3-FOXO1  
114 CRMs (Figure 1c-ii) and, in contrast, most represented in PAX7-FOXO1 CRMs (Figure 1c-iii).  
115 Overall, these results indicate that PAX3-FOXO1 uses its PrD and HD to bind DNA, whereas  
116 PAX7-FOXO1 preferentially uses its HD [23,24]. Thus, the fusion between the DNA-binding  
117 domains of PAX and the transactivation domain of FOXO1 preserved the diversification that has  
118 occurred during evolution in the modes of recruitment to the genome of PAX3 and PAX7. We  
119 then scanned PAX-FOXO1-related CRMs for E-BOX motifs recognized by class II bHLH TFs  
120 (see Materials and Methods; Figure S2c; Table S2). Apart from the PAX3-FOXO1-specific  
121 CRMs, this E-BOX was strongly represented in the other PAX-FOXO1s-bound CRMs,  
122 supporting a common interaction between bHLH TFs and both PAX-FOXO1s [15,19–21]  
123 (Figure 1c-i-iii).

124 We next assessed the activity status of PAX-FOXO1-related regions by mapping the  
125 distribution in the genome of the active histone mark H3K27ac using CUT&Tag (Figure 1a-c).  
126 Recruitment of PAX3-FOXO1 and PAX7-FOXO1 to the genome was generally correlated with  
127 *de novo* deposition of H3K27ac (Figure 1a,b,civ-vi). Therefore, both factors induce active

128 chromatin signatures in healthy cells [15]. Intriguingly, in all CRMs, H3K27ac deposition was  
129 much more increased by PAX7-FOXO1 than by PAX3-FOXO1 (Figure 1a,b, Figure 1c-iv-vi).  
130 Even in PAX3-FOXO1-specific CRMs where PAX7-FOXO1 is poorly recruited, H3K27ac  
131 occupancy levels in PAX7-FOXO1 cells were as high as in PAX3-FOXO1 cells (Figure 1c-v).  
132 Thus, PAX7-FOXO1 exhibits a higher transactivation potential than PAX3-FOXO1. This is  
133 reinforced by a principal component analysis of H3K27ac occupancy in the 6000 PAX-FOXO1  
134 bound CRMs showing that PAX7-FOXO1 set up a chromatin state more distant from that of  
135 control cells than PAX3-FOXO1 (Figure S2d).

136 To further test this idea, we compared, on a few identified CRMs, the deposition of  
137 H3K27ac in PAX-FOXO1-expressing HFFs to the recruitment of this mark in RMS cell lines  
138 (Figure 1d). For the latter, we employed CUT&Tag assays and used quantitative RT-PCR to  
139 assess the enrichment fold for H3K27ac. We used the fusion-negative RDabl cells, SJ-Rh30 and  
140 SJ-Rh4 cells expressing PAX3-FOXO1 and the CW9019 and RMZ-RC2 line expressing PAX7-  
141 FOXO1 [25]. The levels of fusion proteins in SJ-RH30, SJ-RH4 and RMZ-RC2 cells were high  
142 and comparable [14,26], whereas CW9019 had much lower levels of PAX7-FOXO1 [25]. We  
143 selected 11 CRMs following 4 criteria. They were i) bound by PAX3-FOXO1 or PAX7-FOXO1  
144 in PAX-FOXO1 HFF lines (Table S1), ii) shown to be occupied by PAX3-FOXO1 in RMS cell  
145 lines [15], iii) nearby genes with higher expression in FP-RMS than in FN-RMS [14] and iv)  
146 close to genes with PAX-FOXO1-induced expression in HFF lines (Figure 2a, Table S3). In  
147 PAX-FOXO1 HFF lines, 10 of these 11 CRMs displayed higher levels of H3K27ac occupancy  
148 in cell lines expressing PAX7-FOXO1 than in those expressing PAX3-FOXO1 (Figure 1di).  
149 Strikingly, H3K27ac occupancy on all of these CRMs, with the exception of the *RELN* CRM,  
150 appeared at least 4-fold higher in RMZ-RC2 cells than in all other RMS cells (Figure 1dii).  
151 Furthermore, on CRMs adjacent to *DBX1*, *PAX5*, and *SKP2*, H3K27ac enrichment was also  
152 significantly higher in CW9019 cells weakly expressing PAX7-FOXO1 compared to PAX3-

153 FOXO1 and RDabl cells. Thus, PAX7-FOXO1 also emerges as a more potent transactivator than  
154 PAX3-FOXO1 in fully transformed contexts. Altogether, our results demonstrate that the two  
155 RMS-associated fusion TF paralogs displayed divergent genome recruitment, likely stemming  
156 from previously identified discrete affinities of PAX3 and PAX7 DNA-binding domains for  
157 specific DNA motifs [23,24], and their differential trans-activation potential.

158

### 159 **PAX3-FOXO1 and PAX7-FOXO1 specific transcriptomic landscapes**

160 To investigate the phenotypic consequences of the divergent activity of PAX3-FOXO1 and  
161 PAX7-FOXO1 on chromatin, we first compared the RNAseq-based transcriptome of HFFs  
162 expressing either chimeric TF or control HFFs (Figure 2a, S3a; Table S3). Mirroring the  
163 differential H3K27ac landscapes, the transcriptome of PAX7-FOXO1 cells diverged more from  
164 controls than the transcriptome of PAX3-FOXO1 cells (Figure S3a). We identified the genes  
165 whose expression varied the most between samples, which likely underlay the segregation of the  
166 transcriptome, and used K-means clustering heatmaps to highlight their behaviour in the samples  
167 (Figure 2a). PAX3-FOXO1 and PAX7-FOXO1 decreased the expression of the same subset of  
168 genes (cluster A in Figure 2a; Table S3). This subset was weakly enriched in genes in the vicinity  
169 of the identified PAX-FOXO1 recruitment sites, and was therefore unlikely to be directly  
170 regulated by PAX-FOXO1s (Figure 2bi). In contrast, the three clusters of genes upregulated by  
171 PAX3-FOXO1 and/or PAX7-FOXO1 were significantly enriched in genes nearby PAX-  
172 FOXO1s bound CRMs (clusters B to D in Figure 2a; b-ii-iv). In addition, genes more induced  
173 by PAX7-FOXO1 than by PAX3-FOXO1 were mainly enriched in CRMs preferentially bound  
174 by PAX7-FOXO1 (cluster D in Figure 2a; b-iv). Conversely, genes on which PAX3-FOXO1 had  
175 a greater impact than PAX7-FOXO1 were predominantly enriched in CRMs bound by PAX3-  
176 FOXO1 (cluster C in Figure 2a; b-iii). Thus, differences in PAX-FOXO1 recruitment are

177 responsible for differential gene activation. We next compared the transcriptomes of cells  
178 transiently expressing murine *Pax3*, *Pax7*, or *PAX3-FOXO1* or *PAX7-FOXO1*. Genes induced  
179 by both PAX3-FOXO1 and PAX7-FOXO1 were poorly upregulated by Pax3 and Pax7. In  
180 contrast, genes that were specifically induced by one of the PAX-FOXO1 paralogs were also  
181 induced by its wild-type PAX variant and were not induced by the PAX paralog variant (Figure  
182 2c, S3b). Thus, the induction of specific gene cohorts by one of the PAX-FOXO1 chimeras is a  
183 property that emanates from its PAX moiety, whereas the induction of common genes is a  
184 property of the fusion protein.

185 We next wondered whether gene sets specifically associated with the activity of one  
186 PAX-FOXO1 in HFF could explain some of the variation in transcriptomic status of RMS  
187 tumours [8,9,27]. We first evaluated the specific gene signatures of the PAX-FOXO1 paralog in  
188 RMS using previously published microarray data on 99 PAX3-FOXO1 and 34 PAX7-FOXO1  
189 biopsy samples [14] (Figure 2d; Table S4). We identified 988 genes more enriched in PAX3-  
190 FOXO1 biopsies than in PAX7-FOXO1 biopsies and 856 genes specifically enriched in PAX7-  
191 FOXO1 tumours. Functional annotation of these genes highlighted that the PAX3-FOXO1-  
192 specific signature was enriched in regulators of cell cycle, cell migration, and metabolism (Figure  
193 S4a, Table S5). The genes associated with PAX7-FOXO1, on the other hand, encoded regulators  
194 of embryonic lineage differentiation as well as genes involved in cytoskeletal remodelling  
195 (Figure S4b; Table S5). Thus, paralog-specific transcriptional states could confer particular  
196 cellular traits to the cell transformation. Importantly, enrichment analyses indicated that PAX3-  
197 FOXO1 and PAX7-FOXO1 specific gene signatures in RMS and HFFs were significantly  
198 overlapping (Figure 2b-v-viii). Hence, PAX-FOXO1-dependent genetic signatures established  
199 in the cell of origin would be preserved despite the accumulation of genetic aberrations during  
200 cell transformation [5,6] and could provide specific tumorigenic features [3]. Consistent with  
201 this idea, the function of genes differentially expressed between PAX3-FOXO1- and PAX7-

202 FOXO1-expressing HFFs was reminiscent of those differentially expressed between (t2;t13)-  
203 and (t1;t13)-carrying RMS cells (Figure S4c,d; Table S5).

204

205 **Deeper alterations of cell architecture and cell cycle induced by PAX7-FOXO1 than by**  
206 **PAX3-FOXO1**

207 Genes whose expression was differentially modulated by PAX3-FOXO1 or PAX7-FOXO1 were  
208 enriched in cell cycle and cell shape regulators (Figure S4,5). As such, control, PAX3-FOXO1  
209 and PAX7-FOXO1-expressing samples differentially expressed specific members of the  
210 Integrin, Cadherin, Semaphorin, small GTPases, Guanine nucleotide exchange factor (GEF),  
211 GTPase-activating protein (GAP) families or actin-binding and processing proteins (Figure S5a;  
212 Table S3). Hence, they likely possess their own toolkit for regulating acto-myosin network  
213 dynamics and cell adhesions (Figure S5a). Accordingly, cell morphology in these samples was  
214 distinct. This was revealed by monitoring the functional architecture of the cytoskeleton using  
215 phalloidin-labeled F-actin and focal adhesions immunostained with anti-Paxillin (Figure 3a, S6i-  
216 v). While control and PAX3-FOXO1-expressing cells predominantly exhibited a spindle or  
217 triangular shape, more than 35% of PAX7-FOXO1 cells became rounded (Figure 3ai-ix, S6i-v).  
218 Stress fibres terminated by focal adhesions were barely visible in PAX7-FOXO1 cells (Figure  
219 3a-iv', S6iv,v); instead, these cells displayed filopodia-like F-actin microspikes (arrowheads in  
220 Figure 3a-iv'). In contrast, in cells expressing PAX3-FOXO1, stress fibers were greater in  
221 number and thicker than in control cells (Figure 3aiii', S6ii,iii). This indicates that each PAX-  
222 FOXO1 paralog differentially alters actin network dynamics, with PAX3-FOXO1 favouring  
223 contractile actomyosin bundles. Further demonstrating the PAX-FOXO1 paralog specific cell  
224 shape dynamics were variations in the nucleus shape, one of the key organelles of cell  
225 proprioception [28] (Figure 3av-viii, x-xi). Expression of both PAX-FOXO1 chimeric proteins  
226 is associated with the enlargement of HFF nuclei (Figure 3a-x). Yet, consistent with the loss of

227 actin-based tension in PAX7-FOXO1 cells, their nuclei lost their roundness and adopted a bean  
228 or multilobed shape (Figure 3a-viii, xi). Overall, these results indicate that PAX3-FOXO1  
229 enhances cellular features related to cell contractility and surface adhesions already present in  
230 HFF. Instead, PAX7-FOXO1 orients cells towards a distinctive amoeboid-like morphological  
231 state. This would certainly lead to two discrete modes of tissue invasions [29].

232 To assess the impact of PAX-FOXO1s on the cell cycle, we labelled replicating cells  
233 with a 1h30 pulse of EdU, a thymidine analogue, prior to harvest. We then used flow cytometry  
234 to quantify DNA content and replication using DAPI and EdU levels (Figure 3b). Both PAX-  
235 FOXO1s altered the distribution of cells across cell cycle phases (Figure 3b). The number of  
236 cells in the replication (S) phase was reduced in the presence of both chimeras, but this reduction  
237 was much greater in the presence of PAX3-FOXO1 than PAX7-FOXO1 (Figure 3b).  
238 Consistently, CYCLIN-CDK-dependent phosphorylation levels of Rb1 and the cell proliferation  
239 marker Ki-67 (MKI67) were further reduced in PAX3-FOXO1 cells compared to PAX7-FOXO1  
240 cells (Figure 3c,d, S6vi-xv). This is also in agreement with the decreased expression of core cell  
241 cycle genes and the upregulation of cell cycle inhibitors by both PAX-FOXO1 (Figure S5b).  
242 Interestingly, whereas the G1 cell population was dominant in PAX3-FOXO1-expressing HFFs,  
243 PAX7-FOXO1 expression was associated with an increased percentage of cells in G2 (Figure  
244 3bii-iv). This observation was reinforced by the enrichment of PAX7-FOXO1 molecular  
245 signature for genes encoding regulators of the G2 to M transition, whereas PAX3-FOXO1  
246 specifically induced inhibitors of the G1 to S transition (Figure S5b; Table S3). These distinct  
247 effects of PAX-FOXO1 paralogs on the cell cycle could underlie the frequent association in  
248 PAX3-FOXO1 tumours, but not PAX7-FOXO1, with genetic aberrations increasing the  
249 expression of MYCN and CDK4 [6], two G1-to-S transition regulators.

250 Finally, we tested whether PAX-FOXOs-mediated cell cycle deregulation was linked to  
251 DNA damage that can block cell cycle progression [30]. Immuno-labelling of 53BP1<sup>+</sup> and

252  $\gamma$ H2AX<sup>+</sup> DNA double-strand break foci showed that PAX7-FOXO1 was more prone to cause  
253 genomic instabilities than PAX3-FOXO1 (Figure 3e, S6xvi-xx). It remains to be determined  
254 whether this DNA damage is mechanistically related to the enhanced transcriptional properties  
255 of PAX-FOXO1 paralogs [31] or whether it arises from the hijacking of wild-type PAX functions  
256 in preserving genomic integrity [32,33]. Yet, we hypothesize that the DNA damage and cell  
257 cycle defects associated with PAX-FOXO1 paralogs may in turn trigger the gross genomic  
258 rearrangement catastrophes that appear in the FP-RMS after PAX3-FOXO1 and PAX7-FOXO1  
259 generating translocations [5,6,34]. In particular, the enhanced propensity of PAX7-FOXO1 to  
260 alter cell transcriptomic status, morphology, cycling, and genome stability is likely to be  
261 detrimental to cells over the long term. This could therefore explain both the silencing of PAX7-  
262 FOXO1 in most cells in RMS biopsies [35] and the lower frequency of occurrence and  
263 aggressiveness of PAX7-FOXO1-associated RMS compared with PAX3-FOXO1-associated  
264 RMS [1,3].

265 Overall, our study demonstrates that the two PAX-FOXO1 paralogs confer distinct  
266 molecular and cellular characteristics to healthy cells in the early stage of tumorigenic  
267 transformation, which may lead to differential manifestation of patients carrying PAX3-FOXO1  
268 or PAX7-FOXO1 generating translocations.

269

## 270 **Material and methods**

271 Due to the word limit, this section is expanded in the supplementary information file.

272

## 273 **Acknowledgements**

274 We deeply thank the ImagoSeine core facility of Institut Jacques Monod, a member of France-  
275 BioImaging (ANR-10-INBS-04) and certified IBiSA. Notably, S. Many and N. Valentin for

276 performing flow cytometry analyses and N. Moisan for training us on confocal imaging. We are  
277 grateful to L. Vinel for helping us during her undergraduate internship and V. Doye and S.  
278 Nedelec for critical inputs on our manuscript. We are thankful to people who have provided us  
279 with useful tools. We received *pAAVSI-PDi-CRISPRn* from B. Conklin and gRNAs from G.  
280 Church; ERMS and FP-RMS cell lines from C. Gauthier-Rouvière and F. Barr and HFF from  
281 M-C. Geoffroy; the anti-53BP1 and anti- $\gamma$ H2AX antibodies from C. Boumendil and the anti-  
282 PAX3/7HD from N. Patel. We thank Bérengère Guichard for the preparation and purification of  
283 pA-Tn5 enzyme.

284

## 285 **Funding disclosure**

286 VR is a staff scientist from the INSERM, PGH is a CNRS research director, MVCG is a CNRS  
287 staff scientist. LM has obtained a fellowship from University of Paris and her fourth year of PhD  
288 was supported by the Jacques Monod Institute and the Ligue contre le cancer  
289 (PREAC2020.LCC/MC). Work in the lab of VR was supported by the Ligue Nationale Contre  
290 le Cancer (PREAC2020.LCC/MC; PREAC2016.LCC; RS20/75-114). JRA and work in the lab  
291 of MVCG were supported by the European Research Council (ERC-StG-2019 DyNAMECS).

292

## 293 **Author contributions**

294 Conceptualization, LM, PGH, VR; Methodology, LM, JRA, PGH, VR; Software, JRA;  
295 Validation, LM, PGH, VR; Formal Analysis, LM, PGH, VR; Investigation, LM, JRA, PGH, VR;  
296 Resources, JRA, PLL, MVCG, VR; Writing-Original Draft, LM, VR; Writing - Reviewing &  
297 Editing, LM, JRA, MVCG, PGH, VR; Visualization, LM, JRA, VR; Supervision, JRA, PGH,  
298 VR; Project Administration, VR; Funding Acquisition, MVCG, VR.

299

## 300 **Competing Interests**

301 The authors declare that they have no known competing financial interests or personal  
302 relationships that could have appeared to influence the work reported in this paper.

303

## 304       **References**

- 305       1.   Skapek SX, Ferrari A, Gupta AA, Lupo PJ, Butler E, Shipley J, et al.  
306       Rhabdomyosarcoma. *Nat Rev Dis Primers*. 2019;5: 1. doi:10.1038/s41572-018-0051-2
- 307       2.   Parham DM, Barr FG. Classification of Rhabdomyosarcoma and Its Molecular Basis:  
308       Advances In Anatomic Pathology. 2013;20: 387–397.  
309       doi:10.1097/PAP.0b013e3182a92d0d
- 310       3.   Skapek SX, Anderson J, Barr FG, Bridge JA, Gastier-Foster JM, Parham DM, et al. PAX-  
311       FOXO1 fusion status drives unfavorable outcome for children with rhabdomyosarcoma:  
312       A children’s oncology group report: PAX-FOXO1 Influences Survival in RMS. *Pediatr*  
313       *Blood Cancer*. 2013;60: 1411–1417. doi:10.1002/psc.24532
- 314       4.   Kazanowska B, Reich A, Stegmaier S, Békássy AN, Leuschner I, Chybicka A, et al.  
315       PAX3-FKHR and PAX7-FKHR fusion genes impact outcome of alveolar  
316       Rhabdomyosarcoma in children. *Fetal and Pediatric Pathology*. 2007;26: 17–31.  
317       doi:10.1080/15513810701394702
- 318       5.   Chen L, Shern JF, Wei JS, Yohe ME, Song YK, Hurd L, et al. Clonality and Evolutionary  
319       History of Rhabdomyosarcoma. Grosveld GC, editor. *PLoS Genet*. 2015;11: e1005075.  
320       doi:10.1371/journal.pgen.1005075
- 321       6.   Shern JF, Chen L, Chmielecki J, Wei JS, Patidar R, Rosenberg M, et al. Comprehensive  
322       Genomic Analysis of Rhabdomyosarcoma Reveals a Landscape of Alterations Affecting a  
323       Common Genetic Axis in Fusion-Positive and Fusion-Negative Tumors. *Cancer*  
324       *Discovery*. 2014;4: 216–231. doi:10.1158/2159-8290.CD-13-0639
- 325       7.   Sun W, Chatterjee B, Shern JF, Patidar R, Song Y, Wang Y, et al. Relationship of DNA  
326       methylation to mutational changes and transcriptional organization in fusion-positive and  
327       fusion-negative rhabdomyosarcoma. *Int J Cancer*. 2019;144: 2707–2717.  
328       doi:10.1002/ijc.32006
- 329       8.   Davicioni E, Graf Finckenstein F, Shahbazian V, Buckley JD, Triche TJ, Anderson MJ.  
330       Identification of a PAX-FKHR Gene Expression Signature that Defines Molecular  
331       Classes and Determines the Prognosis of Alveolar Rhabdomyosarcomas. *Cancer Res*.  
332       2006;66: 6936–6946. doi:10.1158/0008-5472.CAN-05-4578
- 333       9.   Laé M, Ahn E, Mercado G, Chuai S, Edgar M, Pawel B, et al. Global gene expression  
334       profiling of PAX-FKHR fusion-positive alveolar and PAX-FKHR fusion-negative  
335       embryonal rhabdomyosarcomas. *J Pathol*. 2007;212: 143–151. doi:10.1002/path.2170
- 336       10.   Bennicelli JL, Advani S, Schäfer BW, Barr FG. PAX3 and PAX7 exhibit conserved cis-  
337       acting transcription repression domains and utilize a common gain of function mechanism  
338       in alveolar rhabdomyosarcoma. *Oncogene*. 1999;18: 4348–4356.  
339       doi:10.1038/sj.onc.1202812
- 340       11.   Ren Y-X, Finckenstein FG, Abdueva DA, Shahbazian V, Chung B, Weinberg KI, et al.  
341       Mouse Mesenchymal Stem Cells Expressing PAX-FKHR Form Alveolar  
342       Rhabdomyosarcomas by Cooperating with Secondary Mutations. *Cancer Research*.  
343       2008;68: 6587–6597. doi:10.1158/0008-5472.CAN-08-0859

- 344 12. Keller C. Alveolar rhabdomyosarcomas in conditional Pax3:Fkhr mice: cooperativity of  
345 Ink4a/ARF and Trp53 loss of function. *Genes & Development*. 2004;18: 2614–2626.  
346 doi:10.1101/gad.1244004
- 347 13. Kendall GC, Watson S, Xu L, LaVigne CA, Murchison W, Rakheja D, et al. PAX3-  
348 FOXO1 transgenic zebrafish models identify HES3 as a mediator of rhabdomyosarcoma  
349 tumorigenesis. *eLife*. 2018;7: e33800. doi:10.7554/eLife.33800
- 350 14. Gonzalez Curto G, Der Vartanian A, Frarma YE-M, Manceau L, Baldi L, Prisco S, et al.  
351 The PAX-FOXO1s trigger fast trans-differentiation of chick embryonic neural cells into  
352 alveolar rhabdomyosarcoma with tissue invasive properties limited by S phase entry  
353 inhibition. *PLoS Genet*. 2020;16: e1009164. doi:10.1371/journal.pgen.1009164
- 354 15. Gryder BE, Yohe ME, Chou H-C, Zhang X, Marques J, Wachtel M, et al. PAX3–FOXO1  
355 Establishes Myogenic Super Enhancers and Confers BET Bromodomain Vulnerability.  
356 *Cancer Discov*. 2017;7: 884–899. doi:10.1158/2159-8290.CD-16-1297
- 357 16. Cao L, Yu Y, Bilke S, Walker RL, Mayeenuddin LH, Azorsa DO, et al. Genome-Wide  
358 Identification of PAX3-FKHR Binding Sites in Rhabdomyosarcoma Reveals Candidate  
359 Target Genes Important for Development and Cancer. *Cancer Research*. 2010;70: 6497–  
360 6508. doi:10.1158/0008-5472.CAN-10-0582
- 361 17. Böhm M, Wachtel M, Marques JG, Streiff N, Laubscher D, Nanni P, et al. Helicase  
362 CHD4 is an epigenetic coregulator of PAX3-FOXO1 in alveolar rhabdomyosarcoma.  
363 *Journal of Clinical Investigation*. 2016;126: 4237–4249. doi:10.1172/JCI85057
- 364 18. Thalhammer V, Lopez-Garcia LA, Herrero-Martin D, Hecker R, Laubscher D, Gierisch  
365 ME, et al. PLK1 Phosphorylates PAX3-FOXO1, the Inhibition of Which Triggers  
366 Regression of Alveolar Rhabdomyosarcoma. *Cancer Res*. 2015;75: 98–110.  
367 doi:10.1158/0008-5472.CAN-14-1246
- 368 19. Gryder BE, Pomella S, Sayers C, Wu XS, Song Y, Chiarella AM, et al. Histone  
369 hyperacetylation disrupts core gene regulatory architecture in rhabdomyosarcoma. *Nat*  
370 *Genet*. 2019;51: 1714–1722. doi:10.1038/s41588-019-0534-4
- 371 20. Olgún HC, Patzlaff NE, Olwin BB. Pax7-FKHR transcriptional activity is enhanced by  
372 transcriptionally repressed MyoD. *J Cell Biochem*. 2011;112: 1410–1417.  
373 doi:10.1002/jcb.23057
- 374 21. Calhabeu F, Hayashi S, Morgan JE, Relaix F, Zammit PS. Alveolar rhabdomyosarcoma-  
375 associated proteins PAX3/FOXO1A and PAX7/FOXO1A suppress the transcriptional  
376 activity of MyoD-target genes in muscle stem cells. *Oncogene*. 2013;32: 651–662.  
377 doi:10.1038/onc.2012.73
- 378 22. Kaya-Okur HS, Janssens DH, Henikoff JG, Ahmad K, Henikoff S. Efficient low-cost  
379 chromatin profiling with CUT&Tag. *Nat Protoc*. 2020;15: 3264–3283.  
380 doi:10.1038/s41596-020-0373-x
- 381 23. Jolma A, Yan J, Whittington T, Toivonen J, Nitta KR, Rastas P, et al. DNA-Binding  
382 Specificities of Human Transcription Factors. *Cell*. 2013;152: 327–339.  
383 doi:10.1016/j.cell.2012.12.009

- 384 24. Soleimani VD, Punch VG, Kawabe Y, Jones AE, Palidwor GA, Porter CJ, et al.  
385 Transcriptional Dominance of Pax7 in Adult Myogenesis Is Due to High-Affinity  
386 Recognition of Homeodomain Motifs. *Developmental Cell*. 2012;22: 1208–1220.  
387 doi:10.1016/j.devcel.2012.03.014
- 388 25. Hinson ARP, Jones R, Crose LES, Belyea BC, Barr FG, Linares CM. Human  
389 Rhabdomyosarcoma Cell Lines for Rhabdomyosarcoma Research: Utility and Pitfalls.  
390 *Front Oncol*. 2013;3. doi:10.3389/fonc.2013.00183
- 391 26. Thuault S, Hayashi S, Lagirand-Cantaloube J, Plutoni C, Comunale F, Delattre O, et al. P-  
392 cadherin is a direct PAX3–FOXO1A target involved in alveolar rhabdomyosarcoma  
393 aggressiveness. *Oncogene*. 2013;32: 1876–1887. doi:10.1038/onc.2012.217
- 394 27. Missiaglia E, Williamson D, Chisholm J, Wirapati P, Pierron G, Petel F, et al.  
395 PAX3/FOXO1 Fusion Gene Status Is the Key Prognostic Molecular Marker in  
396 Rhabdomyosarcoma and Significantly Improves Current Risk Stratification. *JCO*.  
397 2012;30: 1670–1677. doi:10.1200/JCO.2011.38.5591
- 398 28. Venturini V, Pezzano F, Català Castro F, Häkkinen H-M, Jiménez-Delgado S, Colomer-  
399 Rosell M, et al. The nucleus measures shape changes for cellular proprioception to control  
400 dynamic cell behavior. *Science*. 2020;370: eaba2644. doi:10.1126/science.aba2644
- 401 29. Friedl P, Locker J, Sahai E, Segall JE. Classifying collective cancer cell invasion. *Nat*  
402 *Cell Biol*. 2012;14: 777–783. doi:10.1038/ncb2548
- 403 30. Chao HX, Poovey CE, Privette AA, Grant GD, Chao HY, Cook JG, et al. Orchestration of  
404 DNA Damage Checkpoint Dynamics across the Human Cell Cycle. *Cell Systems*. 2017;5:  
405 445-459.e5. doi:10.1016/j.cels.2017.09.015
- 406 31. Hamperl S, Bocek MJ, Saldivar JC, Swigut T, Cimprich KA. Transcription-Replication  
407 Conflict Orientation Modulates R-Loop Levels and Activates Distinct DNA Damage  
408 Responses. *Cell*. 2017;170: 774-786.e19. doi:10.1016/j.cell.2017.07.043
- 409 32. Bulut-Karslioglu A, Perrera V, Scaranaro M, de la Rosa-Velazquez IA, van de Nobelen S,  
410 Shukeir N, et al. A transcription factor–based mechanism for mouse heterochromatin  
411 formation. *Nat Struct Mol Biol*. 2012;19: 1023–1030. doi:10.1038/nsmb.2382
- 412 33. Wu T-F, Yao Y-L, Lai I-L, Lai C-C, Lin P-L, Yang W-M. Loading of PAX3 to Mitotic  
413 Chromosomes Is Mediated by Arginine Methylation and Associated with Waardenburg  
414 Syndrome. *J Biol Chem*. 2015;290: 20556–20564. doi:10.1074/jbc.M114.607713
- 415 34. Aguilera A, García-Muse T. Causes of Genome Instability. *Annu Rev Genet*. 2013;47: 1–  
416 32. doi:10.1146/annurev-genet-111212-133232
- 417 35. Azorsa DO, Bode PK, Wachtel M, Cheuk ATC, Meltzer PS, Vokuhl C, et al.  
418 Immunohistochemical detection of PAX-FOXO1 fusion proteins in alveolar  
419 rhabdomyosarcoma using breakpoint specific monoclonal antibodies. *Mod Pathol*. 2020  
420 [cited 17 Dec 2020]. doi:10.1038/s41379-020-00719-0

421

## 422 **Figure Legends**

423  
424 **Figure 1: PAX3-FOXO1 and PAX7-FOXO1 recruitment to the genome and impact on**  
425 **H3K27ac deposition. (a)** Examples of IGV tracks showing normalized FLAG and H3K27ac  
426 CUT&Tag reads distribution in cells expressing either PAX3-FOXO1 (P3F) or PAX7-FOXO1  
427 (P7F) 48h post-DOX treatment. Scales in counts per million (CPM). **(b)** Heatmaps of normalized  
428 FLAG and H3K27ac CUT&Tag signals obtained in control (Ctl), PAX3-FOXO1 (P3F) and  
429 PAX7-FOXO1 (P7F) expressing HFF 48h post-DOX treatment in three CRM clusters. Cluster  
430 1 contains CRMs onto which the occupancy rate of PAX3-FOXO1 and PAX7-FOXO1 are  
431 similar. Cluster 2 CRMs are more bound by PAX3-FOXO1 than PAX7-FOXO1, and cluster 3  
432 is the converse of cluster 2. **(c)** Left panels: Enrichment for DNA binding motifs recognized by  
433 PAX paired (PrD) and/or homeodomain (HD) and by bHLH TFs (E-BOX) in the CRMs  
434 belonging to the clusters defined in (b) (bars:  $-\log_2(p\text{-value})$ ). Right panels: Average profiles of  
435 normalized H3K27ac CUT&Tag signals at CRMs belonging to the clusters defined in (b) in the  
436 indicated control (Ctl), P3F or P7F cell lines. Note that the two P7F purple curves are  
437 superimposed. **(d)** Heatmaps showing the relative levels of H3K27ac CUT&Tag signals on  
438 PAX-FOXO1s bound CRMs nearby the indicated genes in either HFF expressing PAX3-FOXO1  
439 or PAX7-FOXO1 (left heatmap) or indicated RMS cell lines (right heatmap, FN-RMS lines are  
440 in grey, PAX3-FOXO1 FP-RMS in green and marked with # and PAX7-FOXO1 FP-RMS in  
441 purple and labelled with \*\*). The left heatmap was generated using sequencing reads, while the  
442 right heatmap was established from quantitative RT-PCR data. Fold changes across samples are  
443 colour coded from purple-blue (lower levels) and yellow (higher levels).

444  
445 **Figure 2: Characterization of PAX3-FOXO1 and PAX7-FOXO1 specific transcriptomic**  
446 **signatures. (a)** Heatmap of 4 K-means clusters of genes showing significant variations in their  
447 expression between control, PAX3-FOXO1 (P3F) and PAX7-FOXO1 (P7F) expressing cells.  
448 Fold changes across samples are colour-coded in blue (minimum levels) to red (maximum  
449 levels). **(b)** Left panels: Enrichment for genes in the vicinity of CRMs defined in Figure 1b (PFs  
450 CRMs, P3F CRMs, P7F CRMs are respectively clusters 1,2,3 in Figure 1b) in the gene clusters  
451 defined in (a). Right panels: Enrichment for genes associated with FP-RMS<sup>11</sup> (FP-RMS sig.) and  
452 genes associated with PAX3-FOXO1 (P3F FP-RMS sig.) and PAX7-FOXO1 (P7F FP-RMS  
453 sig.) in RMS biopsies in the gene clusters defined in (a). Bars:  $-\log_2(p\text{-value})$ . **(c)** Heatmap of  
454 K-means clustered genes that displayed higher expression in P3F and/or P7F transfected cells  
455 compared to control cells. Fold changes across Pax3, Pax7, P3F and P7F samples are colour

456 coded in blue (lower level) and in red (higher level). **(d)** Volcano plot comparing gene expression  
457 levels assayed by microarray between PAX3-FOXO1 (P3F) and PAX7-FOXO1 (P7F) biopsies,  
458 with statistical significance ( $-\log_{10}(p\text{-value})$ ) on the y-axis versus the magnitude of change  
459 ( $\log_2(\text{fold change in PAX7-FOXO1 samples compared to PAX3-FOXO1})$ ) on the x-axis. Grey  
460 dots: not significantly differentially expressed genes, green dots: significantly upregulated genes  
461 in PAX3-FOXO1 samples, purple dots: significantly upregulated genes in PAX7-FOXO1  
462 samples.

463

464 **Figure 3: PAX3-FOXO1 & PAX7-FOXO1 activities differentially impact the shape of cells**  
465 **and their cycling behaviour. (a)(i-viii)** Immunodetection of Paxillin and GFP, phalloidin based  
466 F-actin labelling and DAPI staining on the indicated HFF cell lines treated for 48h with DOX.  
467 **(ix-xi)** Proportion of cells harbouring the indicated cell morphology (ix), quantification of nuclei  
468 perimeter (x) and solidity (xi) in the indicated cell lines treated with DOX for 48h (bars: mean  $\pm$   
469 s.d.; dots: mean value in independent cell lines; Mann-Whitney U test p-value: \*:  $p < 0.05$ , \*\*:  $p < 0.01$ ,  
470 \*\*\*:  $p < 0.001$ , ns:  $p > 0.05$ ). **(b)(i-iii)** FACS plots displaying EdU levels and DNA  
471 content (DAPI levels) in control cells and in the GFP<sup>+</sup> population of a PAX3-FOXO1 and PAX7-  
472 FOXO1 cell line treated for 48h with DOX. **(ii)** Percentage of cells in the indicated cell cycle  
473 phase established from plots in i (mean over three experiments and three independent lines). **(c-**  
474 **e)(i-iii')** Immunodetection of pRB1, Ki-67,  $\gamma$ H2AX, 53BP1 and GFP and DAPI staining on the  
475 indicated HFF cell lines treated for 48h with DOX. **(c-e)(iv)** Levels of expression of pRB1, Ki-  
476 67 and  $\gamma$ H2AX in control, GFP<sup>+</sup> PAX3-FOXO1 and GFP<sup>+</sup> PAX7-FOXO1 cells treated for 48h  
477 with DOX (dots: cell values, bars: mean  $\pm$  s.e.m., two-way-ANOVA  $p$ -values evaluating the  
478 similarities between PAX3-FOXO1 and PAX7-FOX1 cells lines: \*\*\*\*:  $p < 0.0001$ ).



Manceau et al., Figure 1

Figure 1



Manceau et al., Figure 2
